# Supplementary material
Source: MDPI journal article supplement (https://www.mdpi.com/2076-3417/12/11/5297)
Supplement: s1 [file s1]

**Table S1.** CRII and dH\*(10)/dt values for cut-off rigidities 0.1GV, 3.1GV, 8.5GV and 14.9GV over the years 1996–2019.

| Cut-off Rigidity 0.1GV  |                          |          |          |                    |       |       |
|-------------------------|--------------------------|----------|----------|--------------------|-------|-------|
|                         | CRII (Ion Pairs/(g*s))   |          |          | dH*(10)/dt (μSv/h) |       |       |
| Year                    | FL310                    | FL350    | FL390    | FL310              | FL350 | FL390 |
| 1996                    | 66631.6                  | 93313.2  | 119780.0 | 4.354              | 5.269 | 7.056 |
| 1997                    | 67316.4                  | 94362.8  | 121220.0 | 3.824              | 5.291 | 6.652 |
| 1998                    | 63690.0                  | 88840.0  | 113600.0 | 3.672              | 5.436 | 6.300 |
| 1999                    | 59138.8                  | 82004.8  | 104286.0 | 3.497              | 4.599 | 6.449 |
| 2000                    | 50598.0                  | 69344.0  | 87232.4  | 3.405              | 4.363 | 5.630 |
| 2001                    | 52586.0                  | 72272.0  | 91166.0  | 2.825              | 3.841 | 5.498 |
| 2002                    | 50782.0                  | 69616.0  | 87595.6  | 3.092              | 4.365 | 5.101 |
| 2003                    | 50372.0                  | 69011.2  | 86788.0  | 3.310              | 4.474 | 5.769 |
| 2004                    | 57623.8                  | 79748.8  | 101231.4 | 3.745              | 4.752 | 6.333 |
| 2005                    | 58745.2                  | 81419.2  | 103494.0 | 3.460              | 5.062 | 6.611 |
| 2006                    | 66118.0                  | 92526.0  | 118700.0 | 3.476              | 5.058 | 6.787 |
| 2007                    | 69647.4                  | 97911.2  | 126122.0 | 3.966              | 5.077 | 6.792 |
| 2008                    | 70963.2                  | 99909.2  | 128928.0 | 3.386              | 5.267 | 6.626 |
| 2009                    | 74259.2                  | 104994.0 | 136022.0 | 3.909              | 4.970 | 6.833 |
| 2010                    | 69507.6                  | 97698.8  | 125828.0 | 3.840              | 5.220 | 6.564 |
| 2011                    | 64570.0                  | 90173.2  | 115448.0 | 3.739              | 4.935 | 6.160 |
| 2012                    | 61301.0                  | 85254.0  | 108720.0 | 3.450              | 5.158 | 6.288 |
| 2013                    | 59991.6                  | 83273.6  | 106002.0 | 3.589              | 4.458 | 5.663 |
| 2014                    | 58614.0                  | 81224.0  | 103230.0 | 2.876              | 4.107 | 5.487 |
| 2015                    | 58646.8                  | 81272.8  | 103296.0 | 3.648              | 4.313 | 5.213 |
| 2016                    | 65946.8                  | 92263.6  | 118340.0 | 3.120              | 4.499 | 5.554 |
| 2017                    | 68901.8                  | 96778.4  | 124554.0 | 3.720              | 5.172 | 5.640 |
| 2018                    | 71113.8                  | 100137.8 | 129252.0 | 3.388              | 4.857 | 6.051 |
| 2019                    | 71967.2                  | 101433.2 | 131088.0 | 4.007              | 5.227 | 6.979 |
| Cut-off Rigidity 3.1 GV |                          |          |          |                    |       |       |
|                         | CRII (ion pairs/(g*sec)) |          |          | dH*(10)/dt (μSv/h) |       |       |
| Year                    | FL310                    | FL350    | FL390    | FL310              | FL350 | FL390 |
| 1996                    | 57959.6                  | 79204.8  | 99028.0  | 3.054              | 4.022 | 5.286 |
| 1997                    | 58388.4                  | 79819.2  | 99812.0  | 3.280              | 3.999 | 5.122 |
| 1998                    | 56100.0                  | 76540.0  | 95570.0  | 2.960              | 4.066 | 5.028 |
| 1999                    | 53066.2                  | 72202.0  | 89971.0  | 2.872              | 3.757 | 4.709 |
| 2000                    | 46904.4                  | 63428.8  | 78640.8  | 2.941              | 3.480 | 4.467 |
| 2001                    | 48398.0                  | 65552.0  | 81376.0  | 2.793              | 3.634 | 4.446 |
| 2002                    | 47043.6                  | 63627.2  | 78895.2  | 2.297              | 3.500 | 4.593 |
| 2003                    | 46732.8                  | 63184.8  | 78327.6  | 2.734              | 3.729 | 4.436 |
| 2004                    | 52016.8                  | 70709.2  | 88040.8  | 2.875              | 4.132 | 4.932 |
| 2005                    | 52799.8                  | 71818.0  | 89479.0  | 2.817              | 4.151 | 4.805 |
| 2006                    | 57638.0                  | 78744.0  | 98440.0  | 3.380              | 4.081 | 5.217 |
| 2007                    | 59809.8                  | 81847.8  | 102428.0 | 3.053              | 4.106 | 4.946 |
| 2008                    | 60590.4                  | 82968.4  | 103896.0 | 3.213              | 4.114 | 5.519 |
| 2009                    | 62489.0                  | 85697.6  | 107482.0 | 3.224              | 4.080 | 5.376 |
| 2010                    | 59725.2                  | 81727.2  | 102272.0 | 3.198              | 4.110 | 5.178 |
| 2011                    | 56658.8                  | 77340.8  | 96617.2  | 3.237              | 4.248 | 4.815 |
| 2012                    | 54529.0                  | 74299.0  | 92672.0  | 3.300              | 4.381 | 5.128 |
| 2013                    | 53643.4                  | 73034.0  | 91037.0  | 2.734              | 3.739 | 4.320 |
| 2014                    | 52711.0                  | 71690.0  | 89315.0  | 2.445              | 3.403 | 4.078 |
| 2015                    | 52733.2                  | 71722.0  | 89356.0  | 2.676              | 3.513 | 4.596 |
| 2016                    | 57530.8                  | 78590.4  | 98244.0  | 2.647              | 3.468 | 4.559 |
| 2017                    | 59358.6                  | 81204.6  | 101596.0 | 2.860              | 3.741 | 4.814 |
| 2018                    | 60678.6                  | 83095.6  | 104064.0 | 2.929              | 3.868 | 4.887 |
| 2019                    | 61178.4                  | 83816.4  | 105016.0 | 2.998              | 4.065 | 4.984 |

| Cut-off Rigidity 8.5 GV  |                          |         |         |                    |       |       |
|--------------------------|--------------------------|---------|---------|--------------------|-------|-------|
|                          | CR11 (ion pairs/(g*sec)) |         |         | dH*(10)/dt (μSv/h) |       |       |
| Year                     | FL310                    | FL350   | FL390   | FL310              | FL350 | FL390 |
| 1996                     | 36896.0                  | 48553.2 | 58806.0 | 1.580              | 2.036 | 2.482 |
| 1997                     | 37024.0                  | 48722.8 | 59014.0 | 1.615              | 2.052 | 2.504 |
| 1998                     | 36340.0                  | 47790.0 | 57870.0 | 1.640              | 2.038 | 2.479 |
| 1999                     | 35391.2                  | 46505.8 | 56266.2 | 1.606              | 1.980 | 2.400 |
| 2000                     | 33258.4                  | 43602.8 | 52666.0 | 1.464              | 1.885 | 2.287 |
| 2001                     | 33804.0                  | 44342.0 | 53590.0 | 1.452              | 1.897 | 2.264 |
| 2002                     | 33309.6                  | 43673.2 | 52754.0 | 1.466              | 1.907 | 2.250 |
| 2003                     | 33194.4                  | 43515.6 | 52557.6 | 1.519              | 1.935 | 2.321 |
| 2004                     | 35045.6                  | 46040.8 | 55686.0 | 1.516              | 2.042 | 2.415 |
| 2005                     | 35304.8                  | 46388.2 | 56119.8 | 1.611              | 1.987 | 2.441 |
| 2006                     | 36800.0                  | 48426.0 | 58650.0 | 1.607              | 2.078 | 2.512 |
| 2007                     | 37432.0                  | 49271.2 | 59700.4 | 1.643              | 2.049 | 2.445 |
| 2008                     | 37644.8                  | 49566.0 | 60067.6 | 1.568              | 2.139 | 2.431 |
| 2009                     | 38153.6                  | 50264.8 | 60936.0 | 1.640              | 2.102 | 2.548 |
| 2010                     | 37408.0                  | 49238.8 | 59659.6 | 1.512              | 1.921 | 2.311 |
| 2011                     | 36507.2                  | 48023.2 | 58156.0 | 1.557              | 1.952 | 2.409 |
| 2012                     | 35859.0                  | 47140.0 | 57054.0 | 1.473              | 1.885 | 2.332 |
| 2013                     | 35578.4                  | 46760.6 | 56583.4 | 1.483              | 1.883 | 2.236 |
| 2014                     | 35276.0                  | 46349.0 | 56071.0 | 1.385              | 1.801 | 2.166 |
| 2015                     | 35283.2                  | 46358.8 | 56083.2 | 1.351              | 1.788 | 2.149 |
| 2016                     | 36768.0                  | 48383.6 | 58598.0 | 1.409              | 1.763 | 2.188 |
| 2017                     | 37304.0                  | 49098.4 | 59482.8 | 1.462              | 1.857 | 2.301 |
| 2018                     | 37668.2                  | 49599.0 | 60108.4 | 1.503              | 1.904 | 2.242 |
| 2019                     | 37800.8                  | 49786.0 | 60339.6 | 1.489              | 1.955 | 2.328 |
| Cut-off Rigidity 14.9 GV |                          |         |         |                    |       |       |
|                          | CR11 (ion pairs/(g*sec)) |         |         | dH*(10)/dt (μSv/h) |       |       |
| Year                     | FL310                    | FL350   | FL390   | FL310              | FL350 | FL390 |
| 1996                     | 26450.4                  | 34011.2 | 40623.2 | 0.917              | 1.193 | 1.410 |
| 1997                     | 26501.6                  | 34084.8 | 40712.8 | 0.957              | 1.159 | 1.400 |
| 1998                     | 26210.0                  | 33690.0 | 40230.0 | 0.914              | 1.207 | 1.405 |
| 1999                     | 25781.4                  | 33132.4 | 39539.2 | 0.918              | 1.131 | 1.323 |
| 2000                     | 24798.0                  | 31834.0 | 37958.8 | 0.923              | 1.154 | 1.352 |
| 2001                     | 25050.0                  | 32170.0 | 38362.0 | 0.898              | 1.101 | 1.356 |
| 2002                     | 24822.0                  | 31866.0 | 37997.2 | 0.784              | 1.018 | 1.180 |
| 2003                     | 24768.0                  | 31794.8 | 37910.0 | 0.903              | 1.135 | 1.312 |
| 2004                     | 25623.6                  | 32926.6 | 39295.0 | 0.915              | 1.176 | 1.367 |
| 2005                     | 25740.6                  | 33079.6 | 39476.8 | 0.892              | 1.153 | 1.383 |
| 2006                     | 26412.0                  | 33956.0 | 40556.0 | 0.868              | 1.112 | 1.282 |
| 2007                     | 26672.6                  | 34311.6 | 40990.6 | 0.974              | 1.209 | 1.391 |
| 2008                     | 26767.6                  | 34433.6 | 41139.6 | 0.908              | 1.238 | 1.335 |
| 2009                     | 26988.6                  | 34729.2 | 41498.2 | 0.951              | 1.160 | 1.360 |
| 2010                     | 26662.4                  | 34298.4 | 40974.4 | 0.944              | 1.155 | 1.406 |
| 2011                     | 26284.8                  | 33786.8 | 40348.8 | 0.968              | 1.193 | 1.464 |
| 2012                     | 25992.0                  | 33407.0 | 39886.0 | 0.901              | 1.170 | 1.343 |
| 2013                     | 25869.8                  | 33246.8 | 39674.4 | 0.942              | 1.166 | 1.360 |
| 2014                     | 25727.0                  | 33062.0 | 39456.0 | 0.885              | 1.166 | 1.307 |
| 2015                     | 25730.4                  | 33066.4 | 39461.2 | 0.884              | 1.134 | 1.329 |
| 2016                     | 26399.2                  | 33937.6 | 40533.6 | 0.906              | 1.115 | 1.317 |
| 2017                     | 26618.2                  | 34241.2 | 40904.2 | 0.920              | 1.188 | 1.368 |
| 2018                     | 26778.4                  | 34447.4 | 41156.4 | 0.951              | 1.153 | 1.369 |
| 2019                     | 26839.6                  | 34525.6 | 41251.6 | 0.902              | 1.164 | 1.408 |
